# Supplementary material for: Biodegradable poly(lactide-co-glycolide-co-ε-caprolactone) block copolymers – evaluation as drug carriers for a localized and sustained delivery system
Source: Royal Society of Chemistry journal article supplement (doi:10.1039/c5tb01542a), 2015-01-01
Supplement: c5tb01542a1.pdf [file c5tb01542a1.pdf]

## Supporting Information

### Biodegradable poly(lactide-co-glycolide-co-ε-caprolactone) block copolymers - evaluation as drug carriers for a localized and sustained delivery system

Ji Hoon Park, Hwi Ju Kang, Doo Yeon Kwon, Bo Keun Lee, Bong Lee, Heung Jae Chun, Jae Ho

Kim, Moon Suk Kim\*

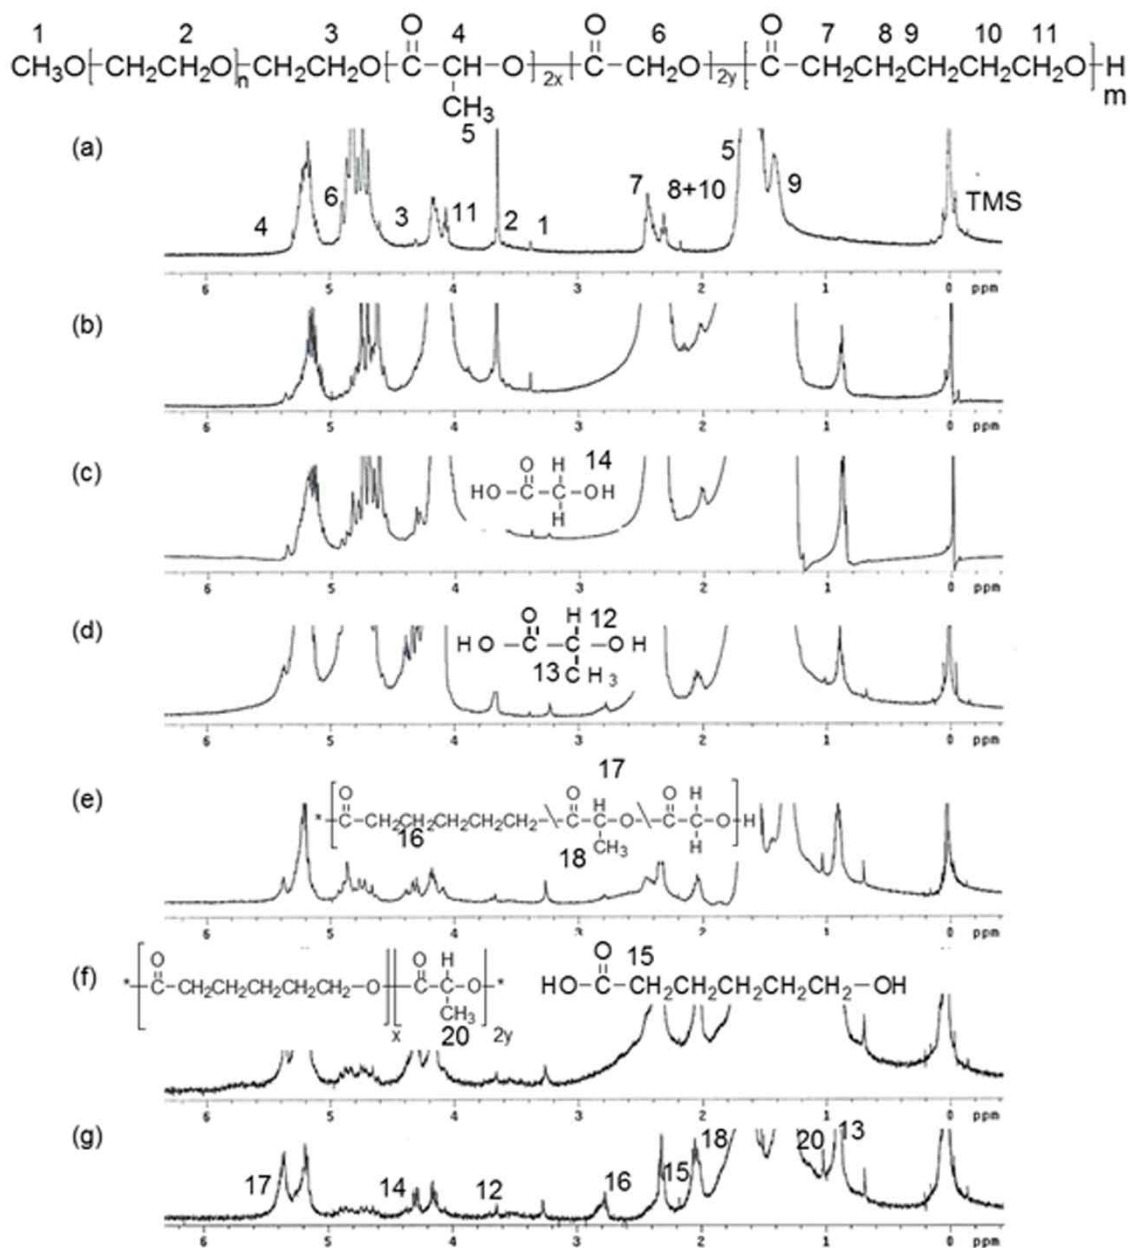

**Figure S1.** Proton Nuclear Magnetic Resonance ( $^1\text{H-NMR}$ ) spectra after 4 weeks *in vivo*. Crude mixture; (a) before degradation, (b) 50K L<sub>1</sub>G<sub>1</sub>C<sub>8</sub>, (c) 50K L<sub>2</sub>G<sub>2</sub>C<sub>6</sub>, (d), 50K L<sub>3</sub>G<sub>3</sub>C<sub>4</sub>, (e) 90K L<sub>4</sub>G<sub>4</sub>C<sub>2</sub>, (f) 50K L<sub>4</sub>G<sub>4</sub>C<sub>2</sub>, (g) 20K L<sub>4</sub>G<sub>4</sub>C<sub>2</sub>.

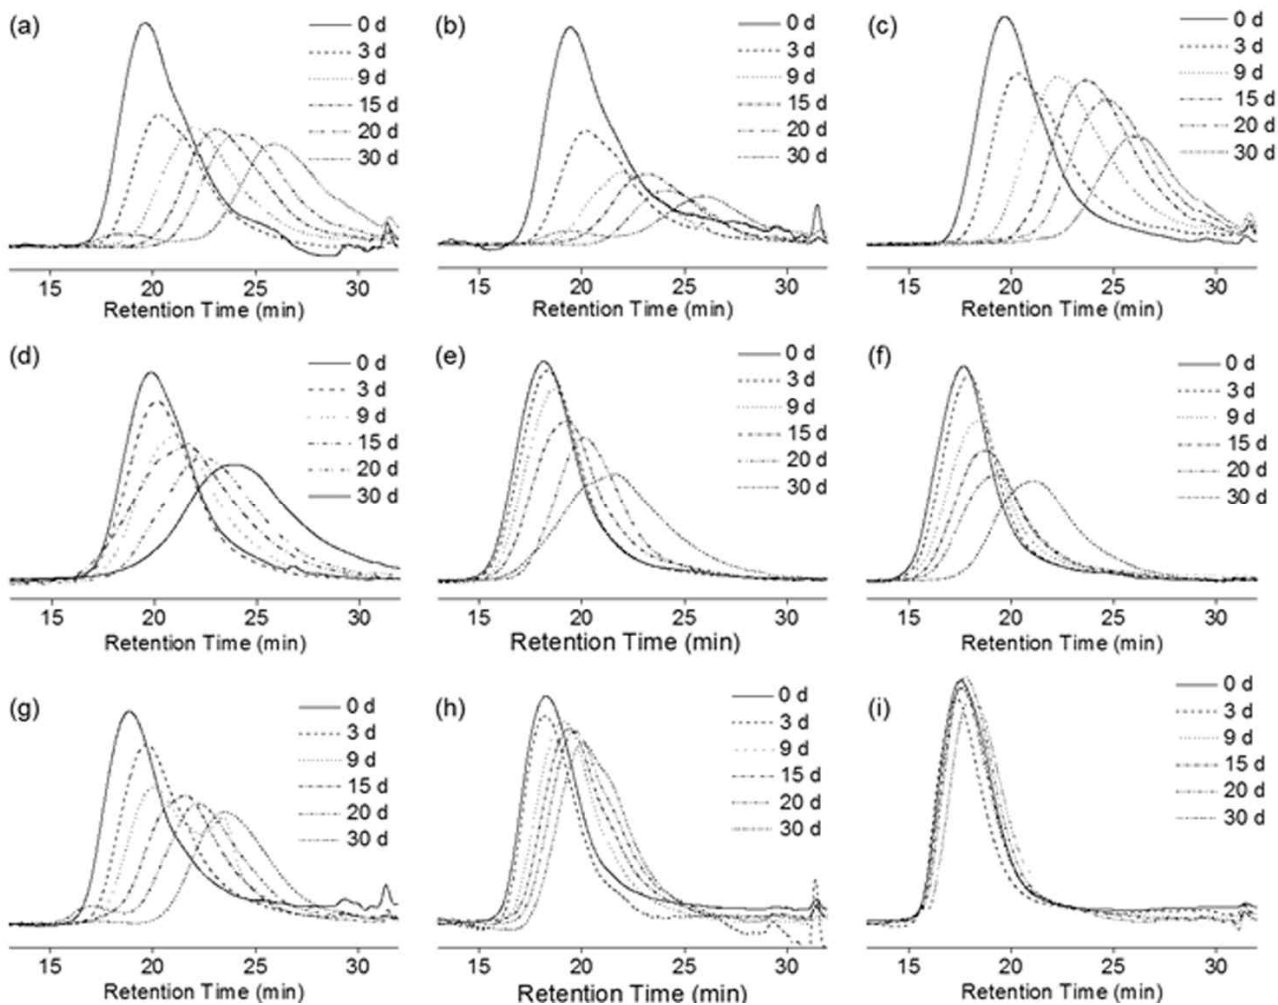

**Figure S2.** Gel permeation chromatograph (GPC) charts of poly(lactide-co-glycolide-co- $\epsilon$ -caprolactone) (PLGC) and poly(lactic acid-co-glycolic acid) (PLGA) in vitro. (a) 20K L<sub>4</sub>G<sub>4</sub>C<sub>2</sub>, (b) 50K L<sub>4</sub>G<sub>4</sub>C<sub>2</sub>, (c) 90K L<sub>4</sub>G<sub>4</sub>C<sub>2</sub>, (d) 20K PLGA, (e) 50K PLGA, (f) 90K PLGA, (g) 50K L<sub>3</sub>G<sub>3</sub>C<sub>4</sub>, (h) 50K L<sub>2</sub>G<sub>2</sub>C<sub>6</sub>, and (i) 50K L<sub>1</sub>G<sub>1</sub>C<sub>8</sub>.

**Table S1.** Thermal properties of poly(lactide-co-glycolide-co- $\epsilon$ -caprolactone) (PLGC) block copolymers.

| Polymer                                          | $T_g$ ( $^{\circ}\text{C}$ ) <sup>a</sup> | $T_m$ ( $^{\circ}\text{C}$ ) | $\Delta H$ | $X_c$ <sup>b</sup> |
|--------------------------------------------------|-------------------------------------------|------------------------------|------------|--------------------|
| 20K L <sub>4</sub> G <sub>4</sub> C <sub>2</sub> | 9                                         | -                            | -          | -                  |
| 50K L <sub>4</sub> G <sub>4</sub> C <sub>2</sub> | 12                                        | -                            | -          | -                  |
| 90K L <sub>4</sub> G <sub>4</sub> C <sub>2</sub> | 3                                         | -                            | -          | -                  |
| 50K L <sub>3</sub> G <sub>3</sub> C <sub>4</sub> | -8                                        | -                            | -          | -                  |
| 50K L <sub>2</sub> G <sub>2</sub> C <sub>6</sub> | -26                                       | -                            | -          | 2.5                |
| 50K L <sub>1</sub> G <sub>1</sub> C <sub>8</sub> | -49                                       | -                            | -          | 7.8                |
| <hr/> <hr/>                                      |                                           |                              |            |                    |
| 20K PLGA <sup>c</sup>                            | 46                                        | 76                           | 0.4        | -                  |
| 50K PLGA                                         | 50                                        | 85                           | 0.6        | -                  |
| 90K PLGA                                         | 52                                        | 87                           | 3.2        | -                  |

<sup>a</sup> Measured by differential scanning calorimeter (*DSC*)

<sup>b</sup>  $X_c$  was calculated as the ratio of the crystalline peak areas to the total areas under the scattering curve

<sup>c</sup> PLGA: poly(lactic acid-co-glycolic acid)
